# Supplementary material
Source: MDPI journal article supplement (https://www.mdpi.com/2072-4292/12/13/2127)
Supplement: s1 [file s1]

Archive with 28 entries (25 files):
- SiteAdapt/DESCRIPTION
- SiteAdapt/NAMESPACE
- SiteAdapt/R
- SiteAdapt/R/SOLIS.r
- SiteAdapt/R/TOA.r
- SiteAdapt/R/adapt_process.R
- SiteAdapt/R/calibration_2016.R
- SiteAdapt/R/m_Kasten.r
- SiteAdapt/R/observed_2013_2016.R
- SiteAdapt/R/post_process.R
- SiteAdapt/R/pre_process.R
- SiteAdapt/R/site_adapt.R
- SiteAdapt/R/target_2013_2016.R
- SiteAdapt/data
- SiteAdapt/data/calibration_2016.RData
- SiteAdapt/data/observed_2013_2016.RData
- SiteAdapt/data/target_2013_2016.RData
- SiteAdapt/man
- SiteAdapt/man/SOLIS.Rd
- SiteAdapt/man/TOA.Rd
- SiteAdapt/man/adapt_process.Rd
- SiteAdapt/man/calibration_2016.Rd
- SiteAdapt/man/m_Kasten.Rd
- SiteAdapt/man/observed_2013_2016.Rd
- SiteAdapt/man/post_process.Rd
- SiteAdapt/man/pre_process.Rd
- SiteAdapt/man/site_adapt.Rd
- SiteAdapt/man/target_2013_2016.Rd
