# Supplementary material
Source: MDPI journal article supplement (https://www.mdpi.com/2072-4292/12/13/2127)
Supplement: s1 [file s1 › SiteAdapt/DESCRIPTION]

Package: SiteAdapt
Type: Package
Title: Site Adaptation of Solar Irradiance Modeled Series
Version: 0.1.0
Author: Carlos M. Fernandez-Peruchena
Maintainer: Carlos M. Fernandez-Peruchena <cfernandez@cener.com>
Description: The SiteAdapt procedure improves the accuracy of modeled solar irradiance series
    through site-adaptation with coincident ground-based measurements relying on the use of a
    regression preprocessing followed by an empirical quantile mapping (eQM) correction.
    Fernandez-Peruchena et al (2020, Remote Sensing).
Imports: glmulti, solaR, hyfo, hydroGOF, RColorBrewer, ggplot2, ggpubr,
        stats
License: GPL-3
Encoding: UTF-8
LazyData: true
RoxygenNote: 7.0.2
NeedsCompilation: no
Packaged: 2020-07-01 18:14:29 UTC; cfernandez
Depends: R (>= 3.5.0)
