# Supplementary material
Source: MDPI journal article supplement (https://www.mdpi.com/2072-4292/12/13/2127)
Supplement: s1 [file s1 › SiteAdapt/man/pre_process.Rd]

% Generated by roxygen2: do not edit by hand
% Please edit documentation in R/pre_process.R
\name{pre_process}
\alias{pre_process}
\title{Preprocessing of solar irradiance series Site adaptation}
\usage{
pre_process(
  subset_target_period,
  latitude_target,
  z_target,
  subset_calibrating_period,
  latitude_calibrat,
  z_calibrat,
  GHI_threshold,
  DNI_threshold
)
}
\arguments{
\item{subset_target_period}{Dataframe object with solar radiation series to be adapted including time (with same time zone as subset_calibrating_period), the solar irradiance modeled series to be site adapted, along with their clear sky index and solar elevation (degrees)}

\item{latitude_target}{Site latitude of solar radiation series to be adapted (degrees, +N)}

\item{z_target}{Site elevation above sea level of solar radiation series to be adapted (m)}

\item{subset_calibrating_period}{Dataframe object with solar radiation series for calibrating including time (with same time zone as subset_target_period), solar irradiance modeled and measured series, along with modeled clear sky index and solar elevation (degrees)}

\item{latitude_calibrat}{Site latitude of solar radiation series for calibrating (degrees, +N)}

\item{z_calibrat}{Site elevation above sea level of solar radiation series for calibrating (m)}

\item{GHI_threshold}{Upper limit of GHI series (same units that Target). For automatic calulation from observed data, set it to -99}

\item{DNI_threshold}{Upper limit of DNI series (same units that Target). For automatic calulation from observed data, set it to -99}
}
\value{
Dataframe object including time and site adapted solar irradiance series
}
\description{
Preprocessing of solar irradiance series Site adaptation
}
