# Supplementary material
Source: MDPI journal article supplement (https://www.mdpi.com/2072-4292/12/13/2127)
Supplement: s1 [file s1 › SiteAdapt/NAMESPACE]

# Generated by roxygen2: do not edit by hand

export(SOLIS)
export(TOA)
export(adapt_process)
export(m_Kasten)
export(post_process)
export(pre_process)
export(site_adapt)
import(RColorBrewer)
import(ggplot2)
import(ggpubr)
import(glmulti)
import(hydroGOF)
import(hyfo)
import(solaR)
import(stats)
