# Supplementary material
Source: MDPI journal article supplement (https://www.mdpi.com/2072-4292/12/13/2127)
Supplement: s1 [file s1 › SiteAdapt/R/observed_2013_2016.R]

#' Dataframe object with ground measured solar radiation.
#'
#' The Dataframe includes time and solar irradiance measured series.
#'
#' @docType data
#'
#' @usage data(observed_2013_2016)
#'
#' @format An object of class \code{"data.frame"}.
#'
#' @keywords datasets
#'
#' @references Fernandez-Peruchena, C. M. et al (2020).
#' Site-adaptation of modeled solar radiation data: The SiteAdapt procedure.
#' Remote Sensing.
#'
#' @source BSRN
#'
"observed_2013_2016"
